# Supplementary material for: A peroxiredoxin, PRDX-2, is required for insulin secretion and insulin/IIS-dependent regulation of stress resistance and longevity
Source: PubMed Central journal article supplement (PMC4531070; doi:10.1111/acel.12321), 2015-03-23
Supplement: acel0014-0558-sd1.pdf [file acel0014-0558-sd1.pdf]

**Fig. S1 Loss of PRDX-2 does not reduce the levels of muscle-secreted GFP that accumulate in coelomocytes.** 100% of control and *prdx-2* RNAi-treated animals expressing a soluble, secreted GFP (ssGFP) from a muscle-specific promoter (*myo-3p::ssGFP*) contained 6 GFP-positive coelomocytes (data not shown) and **[A]** the intensity of GFP fluorescence in these coelomocytes was not reduced by *prdx-2* RNAi whereas **[B]** *prdx-2* RNAi substantially reduced the number of coelomocytes containing visible levels of GFP in wild type (N2) expressing DAF-28::GFP (chi<sup>2</sup>test: control vs *prdx-2* RNAi-treated p=5.82x10<sup>-7</sup>).

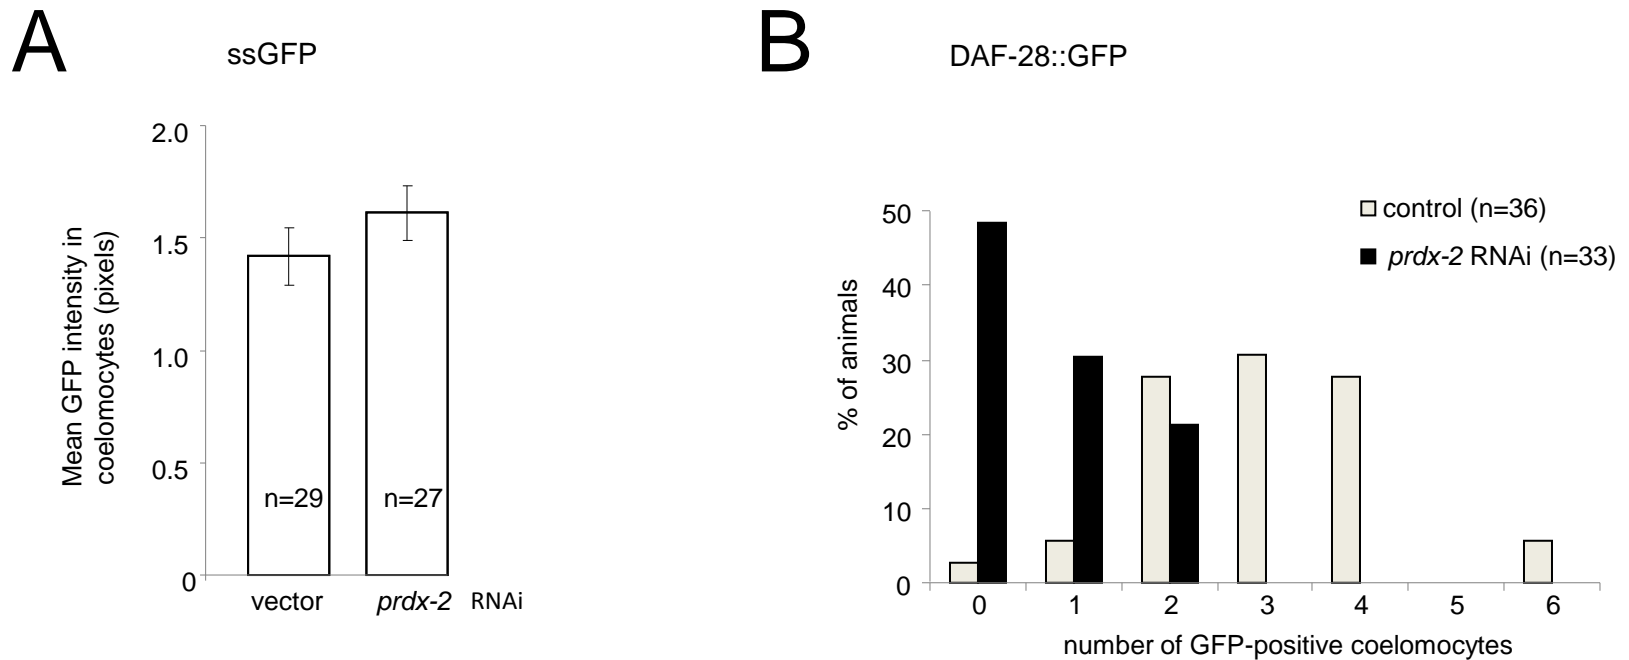

**Fig. S2 Loss of PRDX-2 does not affect total or neuronal levels of DAF-28::GFP protein.** **[A]** Representative fluorescent images taken (under the 63x lens) with identical exposures of the heads of 6 animals, and **[B]** quantification of the GFP fluorescence intensity, reveal similar levels of DAF-28::GFP present in the ASJ or ASI neurones of control and *prdx-2* RNAi-treated 1 day old adult N2 DAF-28::GFP animals. DAF-28::GFP fluorescence was quantified in the brightest neurone (indicated by arrow head) by measuring the mean pixel density in fluorescent images of vector control and *prdx-2* RNAi treated 1 day old adults with identical exposures. Error bars represent the standard deviation from the mean. (n) refers to number of animals in each group. The 8% increase in neuronal DAF-28::GFP in *prdx-2* RNAi-treated animals is consistent with a secretion defect but not statistically significant (T test;  $p=0.138$ ) **[C]** Immunoblotting with anti-GFP antibodies reveals that wild type (N2) and *prdx-2* (*gk169*) mutant animals expressing a DAF-28::GFP transgene contain similar amounts of DAF-28::GFP protein. Non-specific bands that are also present in wild type (N2) animals that do not contain the transgene are indicated (ns) and confirm even protein loading. Image J quantification of DAF-28::GFP and 'ns' bands was used to normalise DAF-28::GFP levels and the relative levels of DAF-28::GFP in wild-type and *prdx-2* mutant animals are indicated. Experiment was repeated with similar results.

**A**

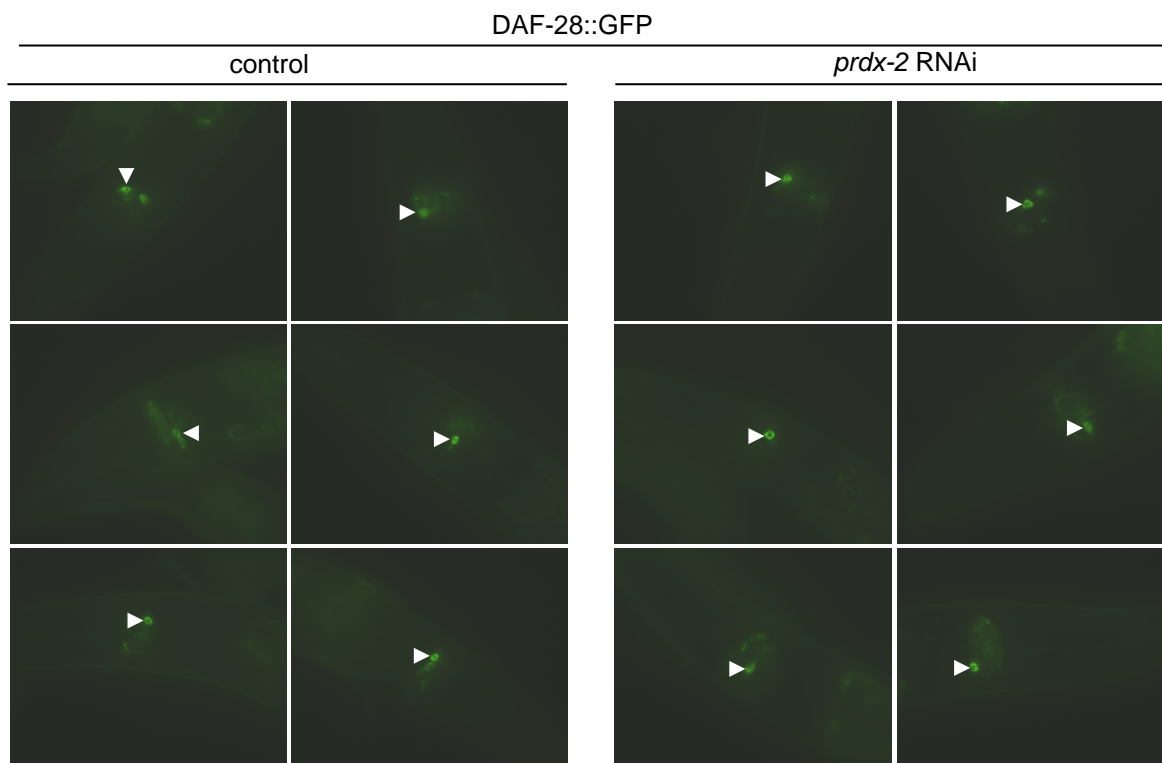

**B**

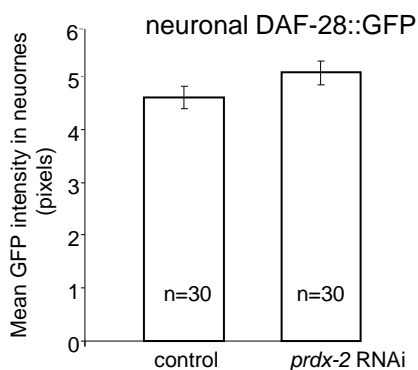

**C**

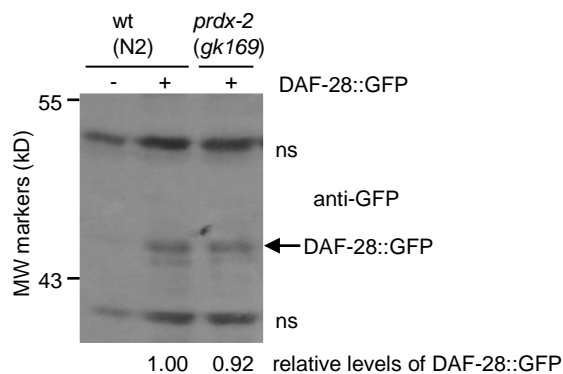

**Fig. S3 Loss of PRDX-2 increases the intestinal expression of a *sod-3p::gfp* reporter in a DAF-2–dependent manner that partially requires DAF-16.**  
**[A]** Representative images of control , *prdx-2* and *daf-2* RNAi-treated N2 *sod-3p::gfp* animals. **[B]** Scoring of *sod-3p::gfp* revealed that **[C]** *prdx-2* RNAi significantly increased the intestinal expression of *sod-3p::gfp* (Chi<sup>2</sup> test p= 0.0075) but to a lesser extent than *daf-2* RNAi (Chi<sup>2</sup> test p= 1.1 x10<sup>-14</sup> ) in N2 *sod-3p::gfp* **[D]** *prdx-2* and *daf-2* RNAi cause much smaller increases in *sod-3p::gfp* expression in *daf-16 (mu86)* *sod-3p::gfp* animals (although still significant; Chi<sup>2</sup> test p<0.001), and *prdx-2* RNAi does not cause any further increase the intestinal expression of *sod-3p::gfp* in *daf-2 (e1370)* animals.

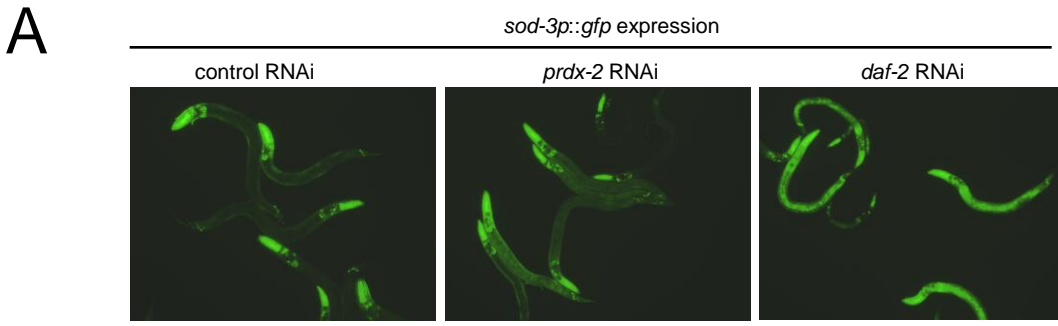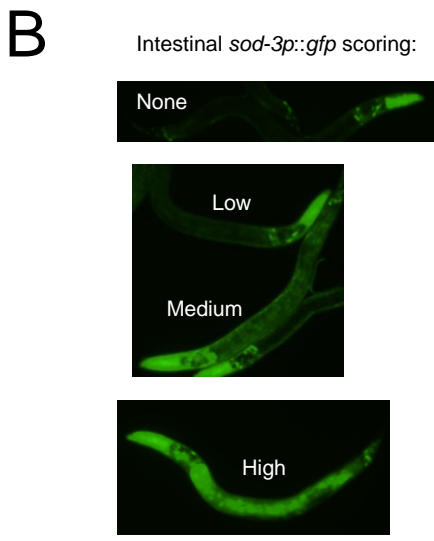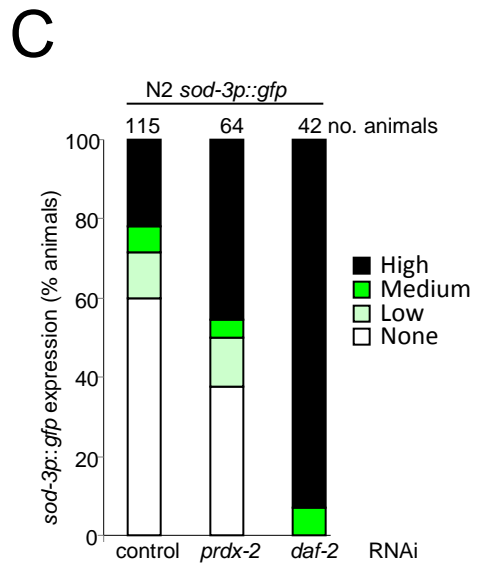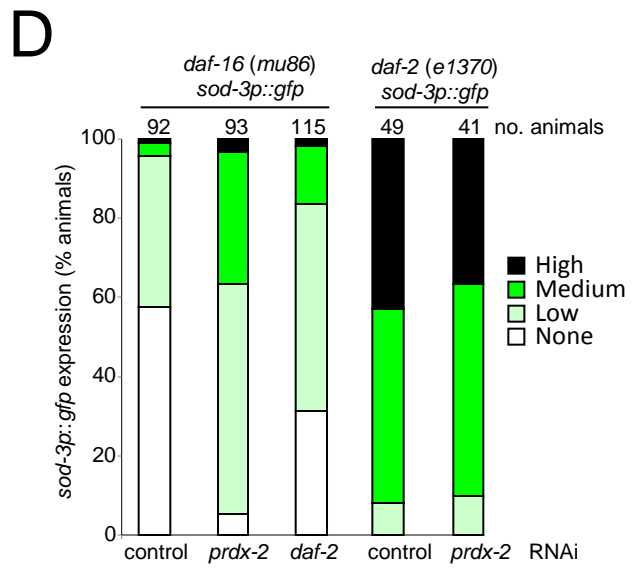

**Fig.S4 Loss of PRDX-2 does not reduce IIS sufficiently to increase fat storage.** Body fat content was visualized in wild type (N2), *prdx-2 (gk169)*, *daf-2 (e1370)* and *prdx-2 (gk169) daf-2 (e1370)* double mutant animals using Sudan black staining (Ogg & Ruvkun 1998). This revealed that *prdx-2* mutant and wild type animals contain similar levels of fat and that loss of PRDX-2 does not affect the increased fat storage associated with reduced DAF-2 activity in *daf-2 (e1370)* mutant animals. The experiment was repeated 3 times yielding similar results. Representative animals are shown.

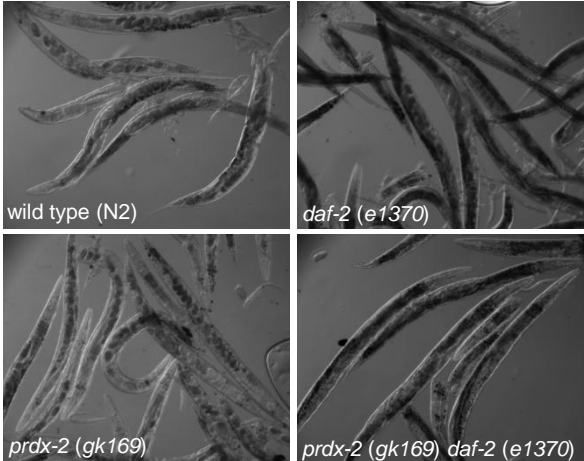

**Fig. S5 PRDX-2 is not required for the extended lifespans associated with reduced CYC-1 levels.** The lifespan of wild type and *prdx-2* (*gk169*) mutant animals on control and *cyc-1* RNAi. *Cyc-1* RNAi extended the lifespan of both wild type (N2) and *prdx-2* mutant animals. The similar lifespan of wild type (N2) and *prdx-2* (*gk169*) mutants on *cyc-1* RNAi suggests that PRDX-2 is not required for the increased lifespan associated with reduced mitochondrial activity (Dillin et al. 2002). This experiment was repeated with similar results and a representative experiment is shown.

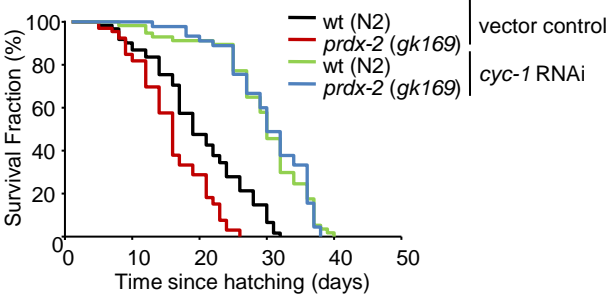

**Table S1 Fold Induction of *gst-7*, *sod-3* and *mtl-1* mRNA in *prdx-2* mutant compared with wild-type animals.** Each experiment represents an independent biological repeat in which the fold induction of *gst-7*, *sod-3* and *mtl-1* mRNA was determined from the mean of 3-5 technical replicate mRNA measurements (relative to mean *act-1* mRNA levels) in RNA samples independently isolated from wild-type and *prdx-2* mutant animals. Although there was some variation in the fold induction between individual experiments, in every experiment there was an increase in the expression of *gst-7*, *sod-3* and *mtl-1* compared with wild-type animals. A Student's T test was used to determine the statistical significance of differences between the levels of *gst-7*, *sod-3* or *mtl-1* mRNA in wild-type and *prdx-2* mutant *C. elegans*.

| <b><i>gst-7</i> mRNA</b>       | Expt 1 | Expt 2 | Expt3  | Expt 4 | Expt 5 | Expt 6 |        | mean | SEM  | T test |
|--------------------------------|--------|--------|--------|--------|--------|--------|--------|------|------|--------|
| wild-type (N2)                 | 1      | 1      | 1      | 1      | 1      | 1      |        |      |      |        |
| <i>prdx-2</i> ( <i>gk169</i> ) | 11.74  | 5.97   | 2.91   | 3.20   | 6.84   | 2.57   |        | 5.54 | 1.43 | 0.025  |
|                                |        |        |        |        |        |        |        |      |      |        |
| <b><i>sod-3</i> mRNA</b>       | Expt 1 | Expt 2 | Expt 3 | Expt 4 | Expt 5 | Expt 6 | Expt 7 |      |      |        |
| wild-type (N2)                 | 1      | 1      | 1      | 1      | 1      | 1      | 1      |      |      |        |
| <i>prdx-2</i> ( <i>gk169</i> ) | 1.65   | 1.65   | 8.45   | 1.25   | 1.45   | 1.62   | 2.94   | 2.72 | 0.91 | 0.13   |
|                                |        |        |        |        |        |        |        |      |      |        |
| <b><i>mtl-1</i> mRNA</b>       | Expt 1 | Expt 2 | Expt 3 | Expt 4 | Expt 5 | Expt 6 |        |      |      |        |
| wild-type (N2)                 | 1      | 1      | 1      | 1      | 1      | 1      |        |      |      |        |
| <i>prdx-2</i> ( <i>gk169</i> ) | 3.7    | 4.9    | 8.01   | 11.25  | 2.13   | 12.17  |        | 7.03 | 1.68 | 0.016  |

**Table S2 Statistical analysis of Lifespan data for experiments shown in Fig.5**

**Figure 5A:**

|                      | RNAi          | n   | Median [days] | Mean ± SEM [days] | p <sup>*</sup> | p <sup>**</sup> | p <sup>***</sup> |
|----------------------|---------------|-----|---------------|-------------------|----------------|-----------------|------------------|
| wild type (N2)       | control       | 128 | 26            | 24.74 ± 0.553     | -              | <0.0001         |                  |
| <i>daf-2 (e1370)</i> | control       | 140 | 33            | 32.31 ± 0.651     | <0.0001        | <0.0001         |                  |
| wild type (N2)       | <i>prdx-2</i> | 128 | 18            | 18.52 ± 0.522     | <0.0001        | -               |                  |
| <i>daf-2 (e1370)</i> | <i>prdx-2</i> | 114 | 18            | 19.03 ± 0.540     | <0.0001        | 0.901           | <0.0001          |

p<sup>\*</sup> - p value [cf with N2 control]

p<sup>\*\*</sup> - p value [cf with N2 + *prdx-2* RNAi]

p<sup>\*\*\*</sup> - p value [cf with *daf-2 (e1370)* control]

**Figure 5B:**

|                     | RNAi          | n   | Median [days] | Mean ± SEM [days] | p <sup>*</sup> | p <sup>**</sup> | p <sup>***</sup> |
|---------------------|---------------|-----|---------------|-------------------|----------------|-----------------|------------------|
| wild type (N2)      | control       | 73  | 18            | 17.14 ± 0.801     | -              | <0.0001         |                  |
| <i>sgk-1 (ft15)</i> | control       | 103 | 24            | 21.83 ± 1.010     | <0.0001        | <0.0001         |                  |
| wild type (N2)      | <i>prdx-2</i> | 60  | 13            | 12.13 ± 0.523     | <0.0001        | -               |                  |
| <i>sgk-1 (ft15)</i> | <i>prdx-2</i> | 93  | 14            | 13.67 ± 0.371     | <0.0001        | 0.019           | <0.0001          |

p<sup>\*</sup> - p value [cf with N2 control]

p<sup>\*\*</sup> - p value [cf with N2 + *prdx-2* RNAi]

p<sup>\*\*\*</sup> - p value [cf with *sgk-1 (ft15)* control]

**Figure 5C:**

|                | RNAi          | n  | Median [days] | Mean ± SEM [days] | p <sup>*</sup> | p <sup>**</sup> | p <sup>***</sup> |
|----------------|---------------|----|---------------|-------------------|----------------|-----------------|------------------|
| wild type (N2) | control       | 64 | 18            | 16.84 ± 0.655     | -              | <0.0001         |                  |
| <i>hsf-1oe</i> | control       | 54 | 25            | 22.72 ± 1.070     | <0.0001        | <0.0001         |                  |
| wild type (N2) | <i>prdx-2</i> | 81 | 13            | 12.26 ± 0.484     | <0.0001        | -               |                  |
| <i>hsf-1oe</i> | <i>prdx-2</i> | 78 | 13            | 11.86 ± 0.515     | <0.0001        | 0.635           | <0.0001          |

p<sup>\*</sup> - p value [cf with N2 control]

p<sup>\*\*</sup> - p value [cf with N2 + *prdx-2* RNAi]

p<sup>\*\*\*</sup> - p value [cf with *hsf-1 oe* control]

## Supplemental methods

### *C. elegans* strains

N2 Bristol as wild type, VE1: *prdx-2 (gk169)* II, CB1370: *daf-2 (e1370)* III, VE14: *prdx-2 (gk169)* II; *daf-2 (e1370)* III, CF1038: *daf-16 (mu86)* I, EU1: *skn-1 (zu67)* IV, KQ1654: *sgk-1 (ft15)*, BQ1: *akt-1 (mg306)* V, CF1824: *muEx265 [HSF-1p::HSF-1cDNA +myo-3::GFP]*, CF1407: *daf-16 (mu86)* I; *muIs71 [pKL99(daf-16Ap::GFP::daf-16A(bKO)) + pRF4(rol-6)]*, XA2974: *age-1(hx546) daf-16 (mu86)* I; *muIs71 [pKL99(daf-16Ap::GFP::daf-16A(bKO)) + pRF4(rol-6)]*, VE15: *prdx-2 (gk169)* II *daf-16 (mu86)* I; *muIs71 [pKL99(daf-16Ap::GFP::daf-16A(bKO)) + pRF4(rol-6)]*, CF1553: *muIs84 [(pAD76) sod-3p::GFP + rol-6]*, CF1874: *daf-16(mu86)* I; *muIs84 [(pAD76) sod-3p::GFP + rol-6]*, CF1580: *daf-2(e1370)* III; *muIs84 [(pAD76) sod-3p::GFP + rol-6]*, LD1257: N2 *ldEx010 [SKN-1op::GFP]*, LD1250: N2 *ldEx007 [SKN-1B/C::GFP]*, LD1256: N2 *ldEx015 [SKN -1op<sup>S12A</sup>::GFP]*, LD1252: N2 *ldEx020 [SKN-1B/C<sup>S393A</sup>::GFP]*, GS1912: *arIs37 [myo-3p::ssGFP + dpy-20(+)]* I; *dpy-20(e1282)* IV, VB1605: *unc-4 (e120)* II; *svIs69 [(Pdaf-28::daf-28::GFP) + unc-4 (+)]*. The continued presence of the *unc-4 (e120)* allele in the backcrossed VB1605 was unconfirmed. VE16: *prdx-2 (gk169) unc-4 (e120)* II; *svIs69 [(Pdaf-28::daf-28::GFP) + unc-4 (+)]*. VE14 was obtained from a cross between VE1 and CB1370. VE15 was obtained from a cross between VE1 and CF1407. VE16 was obtained from a cross between VE1 and VB1605. Strains were maintained using standard methods (Brenner 1974).

### Analysis of DAF-28::GFP levels by immunoblotting

Approximately 5000 synchronised 1 day old adult worms (N2, VB1605 or VE16) maintained on HT115 containing pL4440 were harvested and proteins extracted under native conditions, basically as described previously (Olahova *et al.* 2008). 40µg of reduced,



denatured protein was loaded into each lane and analysed by immunoblotting using 1 in 2000 diluted rabbit anti-GFP primary antibodies (Molecular Probes), HRP-conjugated anti-rabbit antibodies, chemiluminescent (ECL) detection and X ray film (Fuji).

### **Analysis of *sod-3p::gfp* expression**

To determine the expression of *sod-3p::gfp* 10 late L4 larval stage wild-type (N2), *daf-2* (*e1370*) or *daf-16* (*mu86*) animals containing the *sod-3p::gfp* reporter gene (CF1553, CF1580 or CF1874 respectively) were transferred to RNAi plates seeded with control pL4440, pL4440 + *prdx-2* or pL4440 + *daf-2* containing *E. coli* HT115. Animals were maintained at 15°C and *sod-3p::gfp* expression analysed in young adult (N2) or L2/3 larval (*daf-2* or *daf-16*) F1 progeny. *Sod-3p::gfp* expression in the intestine was scored as none, low (20% of cells contain GFP), medium (more than 20% of cells contain GFP) or high (all cells contain GFP). Images were acquired using Axiovision 3.1 and a  $\chi^2$  test (Microsoft Excel) used to determine whether differences were statistically significant.

### **Sudan Black fat staining**

Well-fed animals were washed in M9 buffer for 30 minutes, fixed in 1% (w/v) paraformaldehyde, followed by three freeze/thaw cycles. After fixation worms were subjected to 3 sequential washes in 25%, 50% and 70% ethanol. The worms were stained overnight in a saturated solution of Sudan black in 70% ethanol, re-hydrated through series of ethanol washes (70%-50%-25%) and the fat droplets were visualised by light microscopy using a Zeiss Axioskop 2 (10x objective lens).

### **Supplementary references**

Brenner, S. (1974). The genetics of *Caenorhabditis elegans*. *Genetics* 77, 71-94.

Dillin A, Hsu AL, Arantes-Oliveira N, Lehrer-Graiwer J, Hsin H, Fraser AG, Kamath RS, Ahringer J, Kenyon C (2002). Rates of behavior and aging specified by mitochondrial function during development. *Science*. 298, 2398-2401.

Ogg, S., and Ruvkun, G. (1998). The *C. elegans* PTEN homolog, DAF-18, acts in the insulin receptor-like metabolic signaling pathway. *Mol Cell* 2, 887-893.
